# Supplementary material for: A Genome-Wide Survey of Genetic Variation in Gorillas Using Reduced Representation Sequencing
Source: PubMed Central journal article supplement (PMC3672199; doi:10.1371/journal.pone.0065066), 2013-06-04
Supplement: pone.0065066.s001.pdf [file pone.0065066.s001.pdf]

Supplementary information 1: Gorilla family trees. Information on the geographical origin of the sampled gorillas are based on the capture locations of the gorillas themselves or (in the case of captive-born individuals) the capture locations of their wild-born ancestors.

1) Snowflake, AKA Floquet (#0281)  
Born in the wild (~1962)  
Captured in Equatorial Guinea (source: Jonch, 1968)

2) Guy (#0005)  
Born in the wild (~1946)  
Captured in Cameroon (then French Cameroons) (source: Natural History Museum)

3) Mukisi (#9912)  
Born in the wild (~1957)  
Captured in the Walikale region, Democratic Republic of Congo (source: Jensen-Seaman & Kidd, 2001)

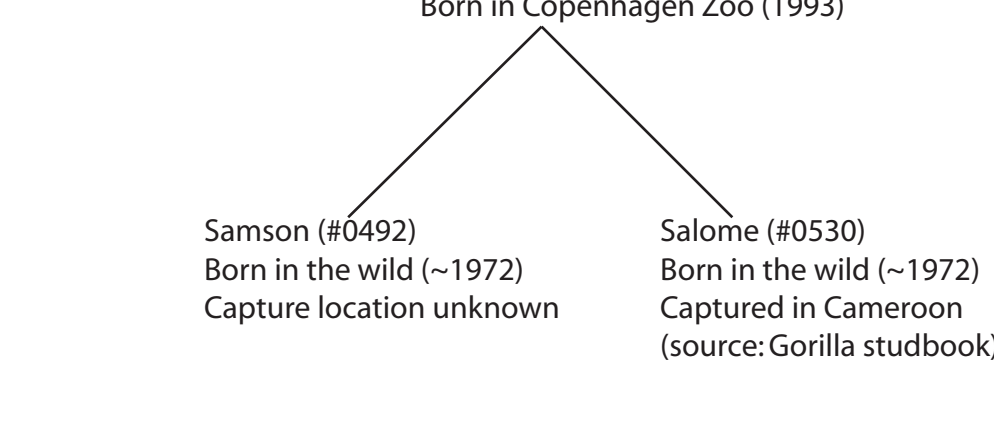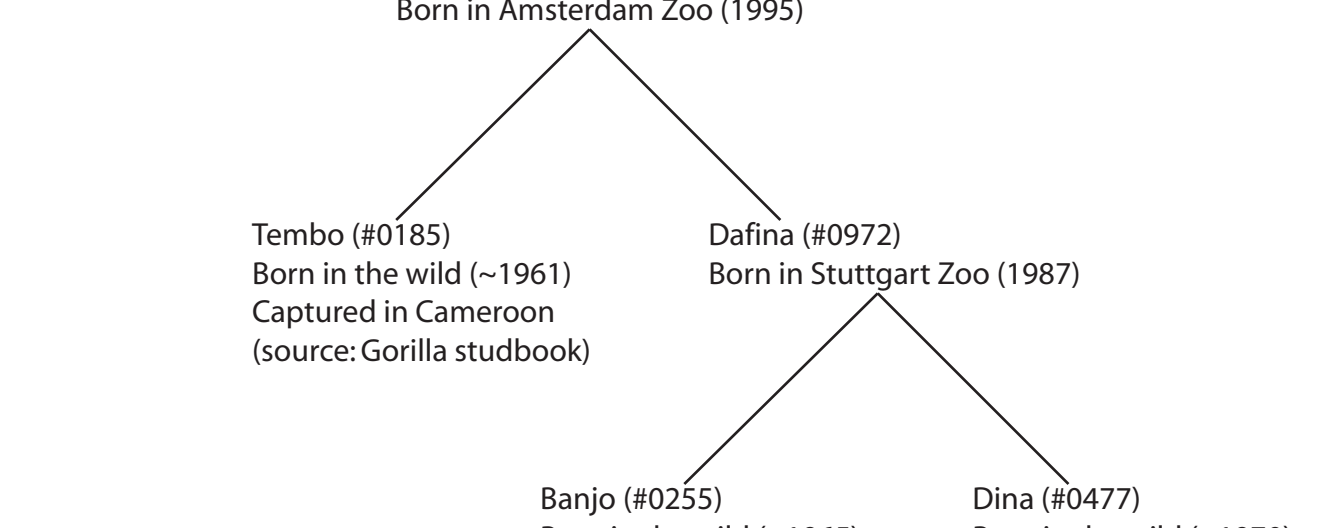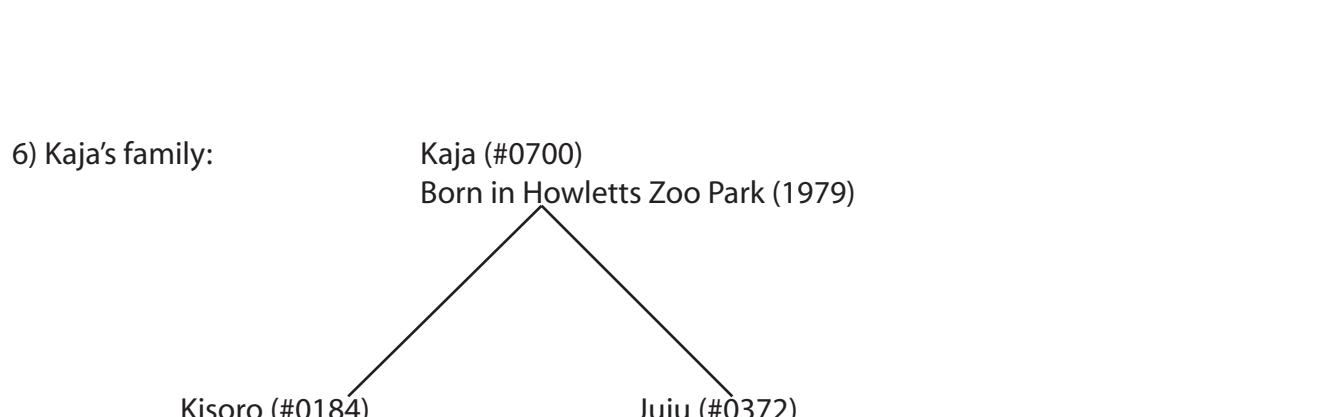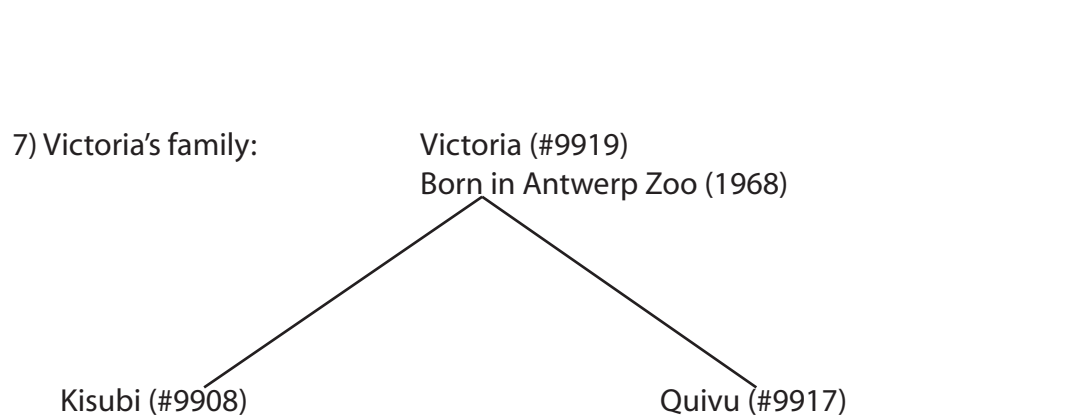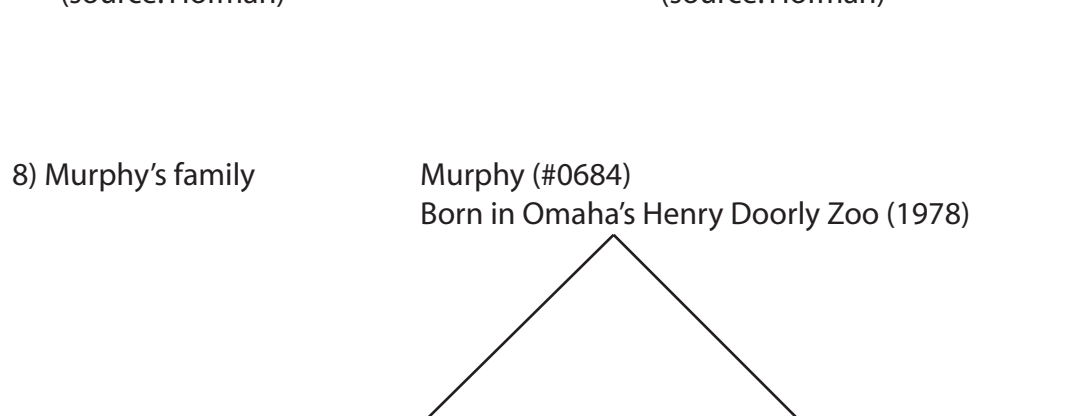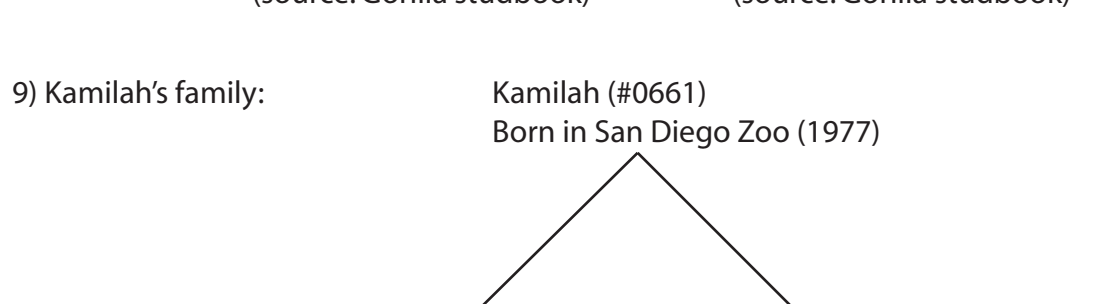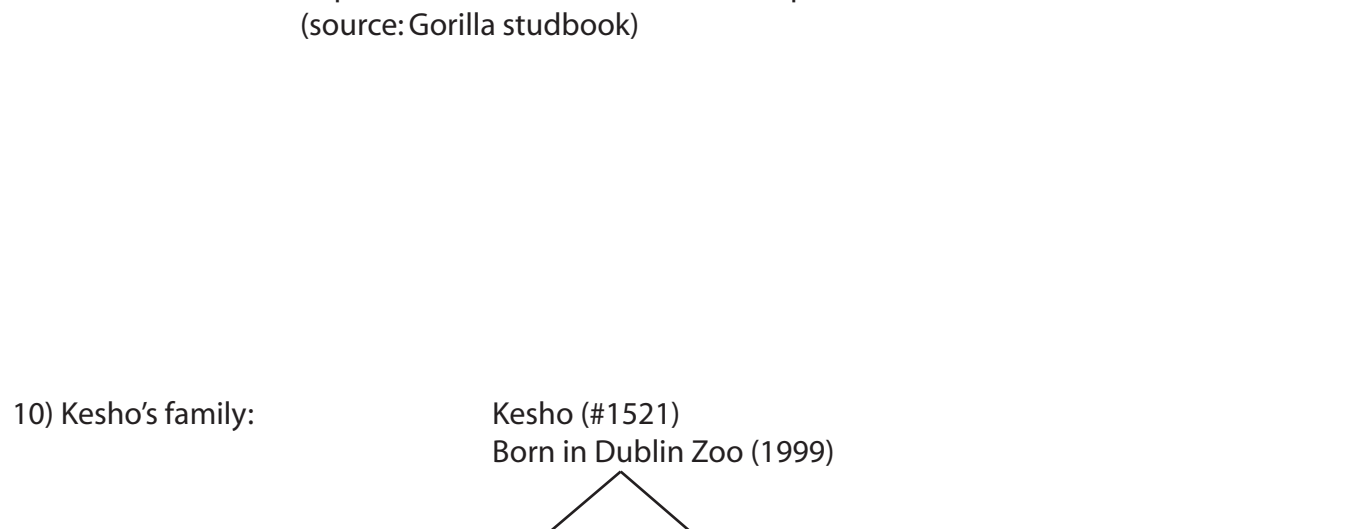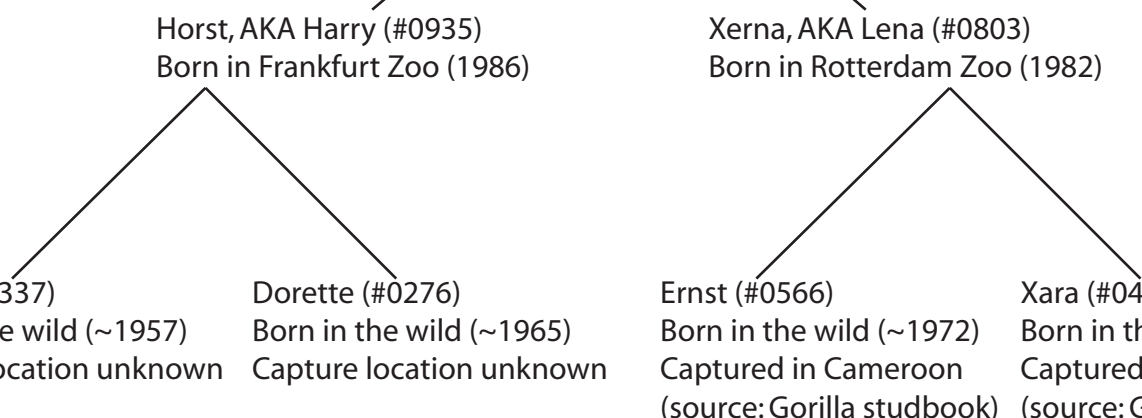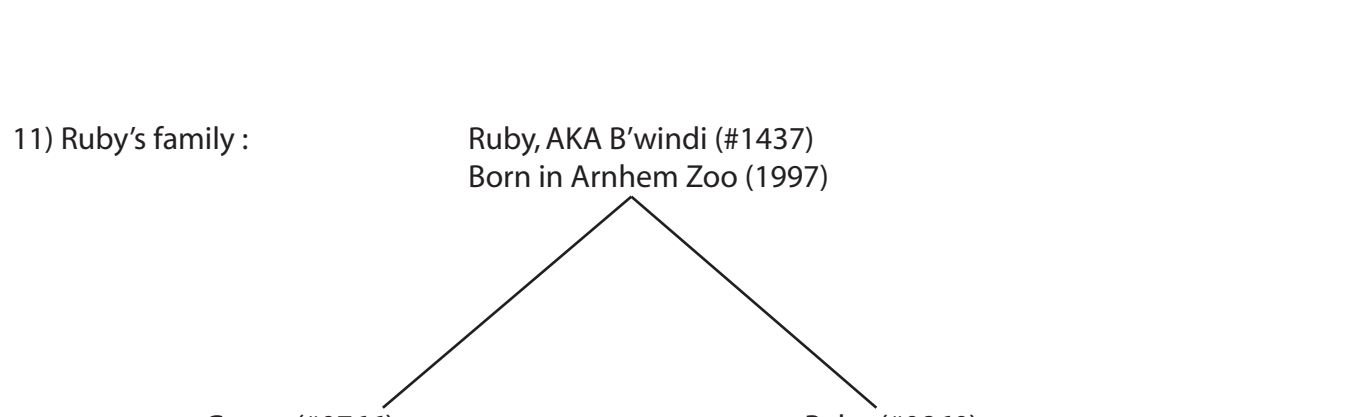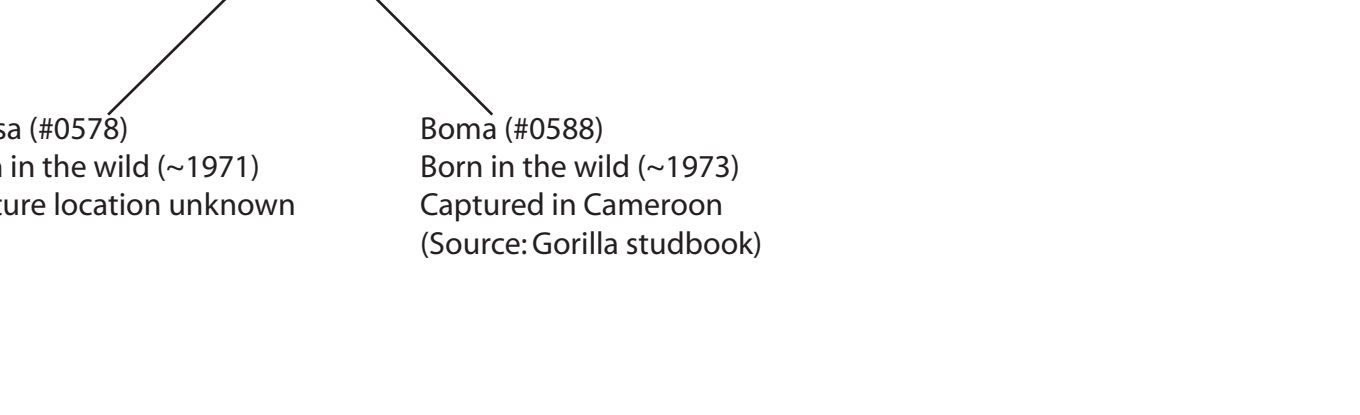

14) EB(JC): The sample from EB(JC) was purchased from the European Collection of Cell Cultures (ECACC), and we do not have any information on its origin.

Sources for capture locations:  
- Aspinall, J. (1976). The Best of Friends. London: MacMillan  
- Hofman, S. Curator of Mammals, Antwerp Zoo, personal communication  
- International Gorilla Studbook (2001, 2006 and 2010), published by Frankfurt Zoo.  
- Jonch, A. (1968). The white Lowland gorilla Gorilla g. gorilla at Barcelona Zoo. International Zoo Yearbook, 8(1): 196-197.  
- Jensen-Seaman, M.I. and Kidd, K.K. (2001). Mitochondrial DNA variation and biogeography of eastern gorillas. Molecular Ecology, 10: 2241-2247  
- Natural History Museum website (07/12/2012)  
<http://www.nhm.ac.uk/nature-online/collections-at-the-museum/museum-treasures/guy-the-gorilla/index.html>
