# Supplementary material for: A Genome-Wide Survey of Genetic Variation in Gorillas Using Reduced Representation Sequencing
Source: PubMed Central journal article supplement (PMC3672199; doi:10.1371/journal.pone.0065066), 2013-06-04
Supplement: pone.0065066.s002.pdf [file pone.0065066.s002.pdf]

# A genome-wide survey of genetic variation in gorillas using reduced representation sequencing

## Supplementary figures and tables

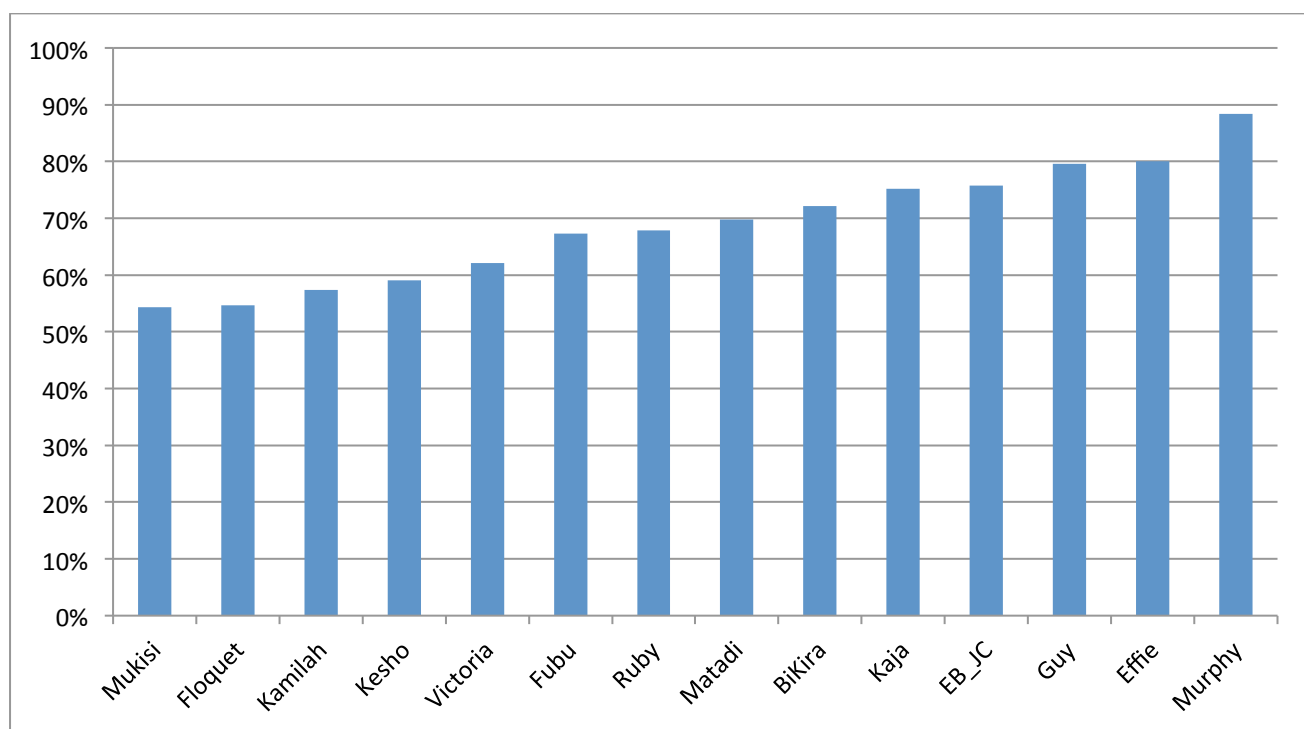

Figure S1: Percentage of target *AluI* fragments sites (150-250) bp covered in the 14 gorillas sequenced.

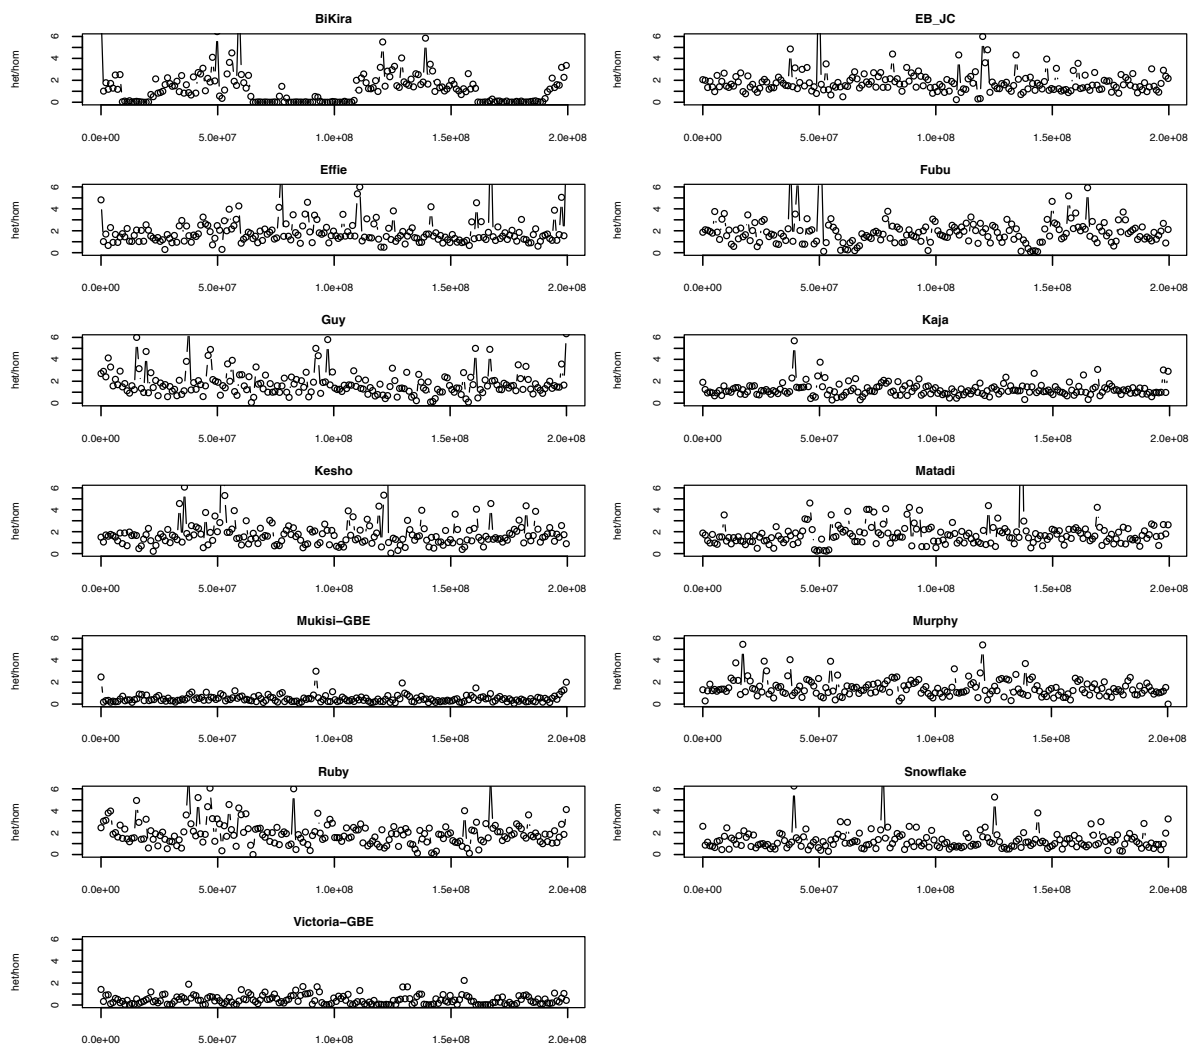

**Figure S2: Ratio of heterozygous to homozygous variant sites in 1 Mbp bins along Chromosome 3 for 13 gorillas.** Note the extended tracts of homozygosity in BiKira. Other chromosomes (not shown) display a similar pattern.

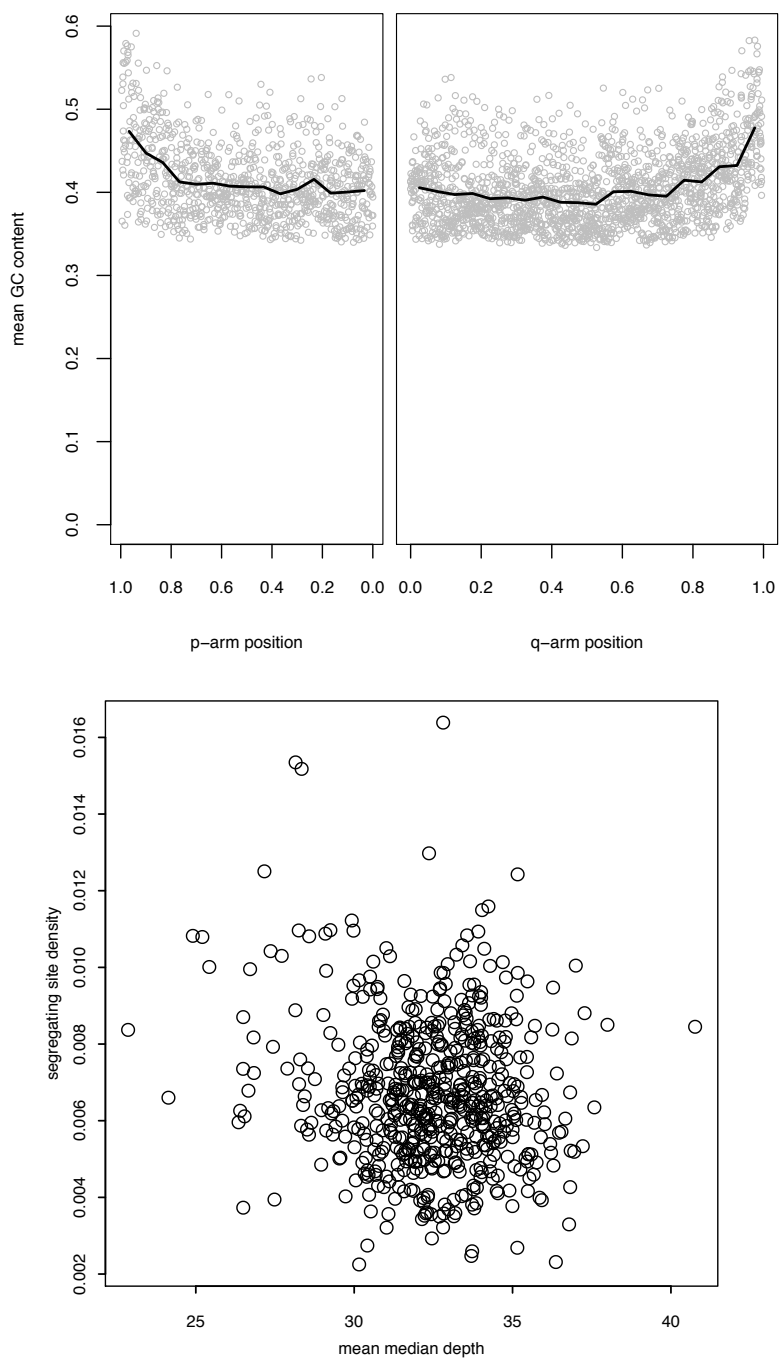

**Figure S3: GC content does not explain the pattern of heterozygosity seen in Figure 2.** *Upper panel:* GC does increase on average towards the telomeres, but the same is not true in pericentromeric regions. *Lower panel:* there is no significant correlation between the density of segregating sites in 1 Mbp regions genome wide and sequence depth (where the latter is represented by the mean median depth of all samples at each base in each region).

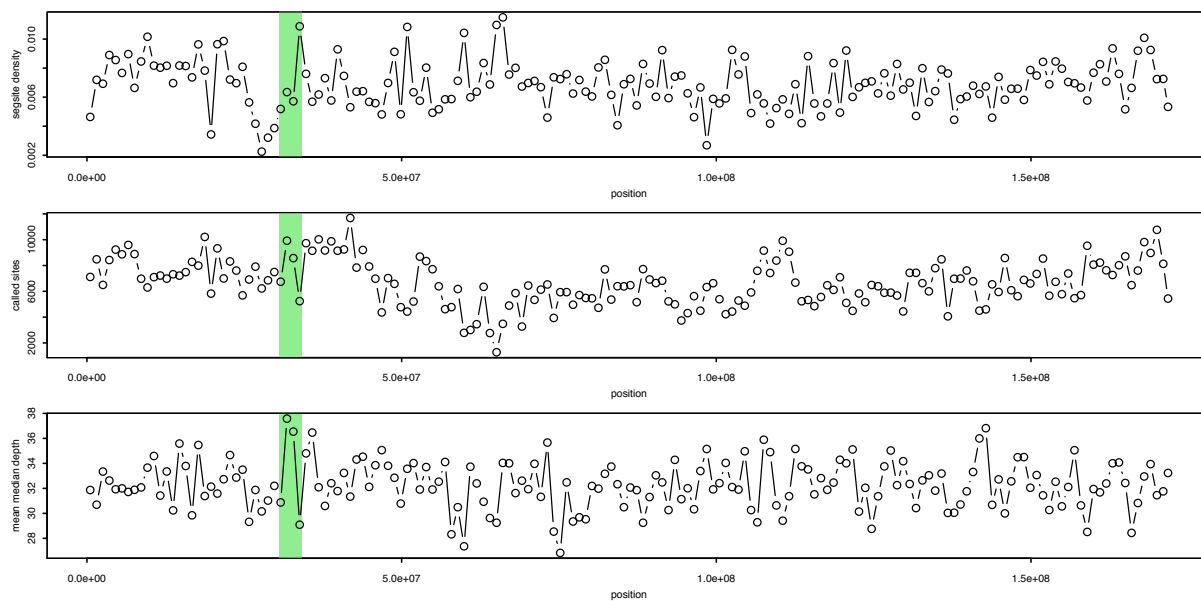

**Figure S4: Western lowland gorilla polymorphism rate, number of called sites and mean median depth along Chromosome 6.** Each point represents a 1 Mbp bin. The green shaded region indicates the location of the MHC.

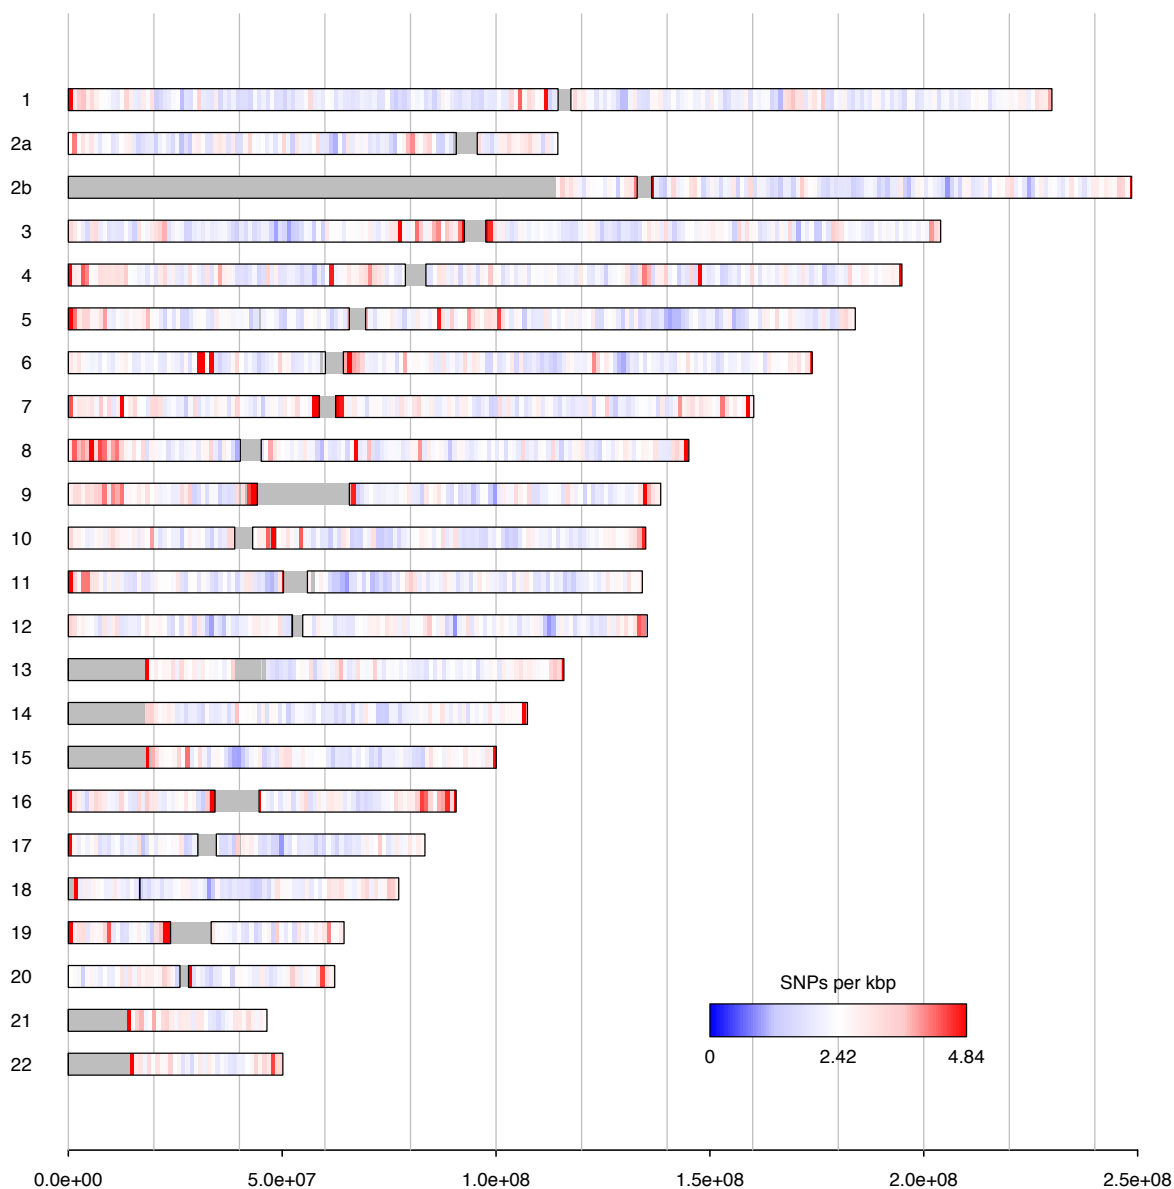

**Figure S5: Density of segregating sites in ten western chimpanzees (*Pan troglodytes verus*).** Segregating sites are based on genome-wide sequencing data from [20]. Sites passing quality and depth filtering thresholds in all ten samples were binned in 1 Mb bins and the density of segregating sites calculated. Resulting densities are plotted on an ideogram, with the scale expressed as number of sites per kbp. Note the prominent signal of increased diversity at the MHC locus on 6p.

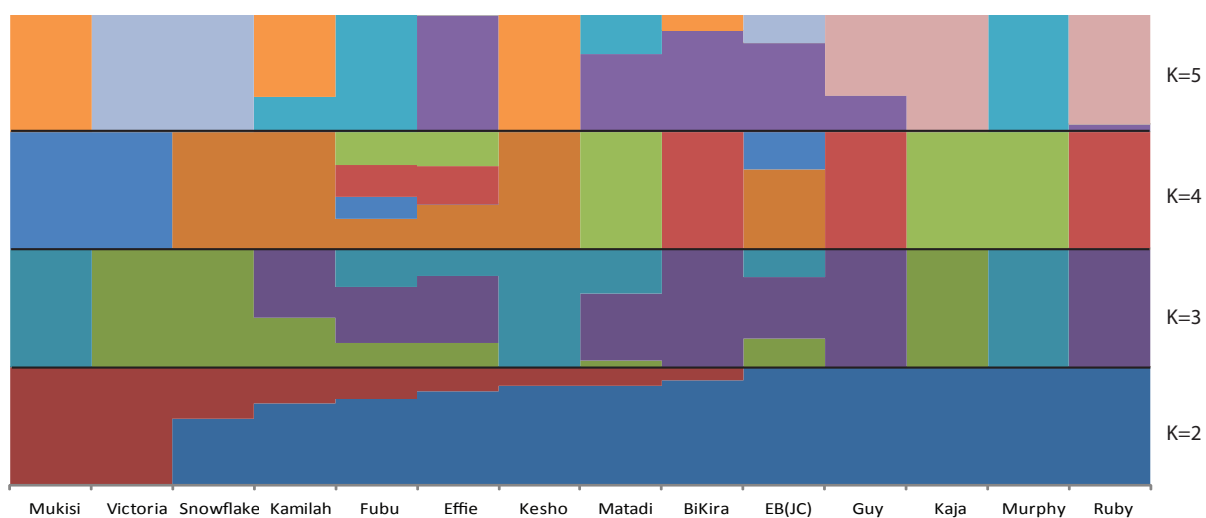

**Figure S6: ADMIXTURE plot of eastern lowland and western lowland gorillas.** Each gorilla is represented by a single vertical bar and the proportion of ancestry is displayed in different colours. For K=2, red represents the eastern component and blue the western component; this was estimated to be the optimum number of clusters based on a cross-validation procedure. The estimation of individual ancestries based on K=3, 4 and 5 ancestral populations are also shown.

**Table S1: SNPs called per chromosome.** SNPs in repeat masked regions or at sites where the coverage depth was less than 10 or more than 100 in at least one individual were excluded.

| Chr          | SNPs           | Transitions    | Transversions | Ts/Tv ratio        |
|--------------|----------------|----------------|---------------|--------------------|
| 1            | 248308         | 168454         | 79854         | 2.109524883        |
| 2a           | 128033         | 86992          | 41041         | 2.119636461        |
| 2b           | 139088         | 94870          | 44218         | 2.145506355        |
| 3            | 196184         | 131977         | 64207         | 2.055492392        |
| 4            | 200278         | 136286         | 63992         | 2.129734967        |
| 5            | 175019         | 118626         | 56393         | 2.103558952        |
| 6            | 186986         | 127638         | 59348         | 2.150670621        |
| 7            | 179279         | 121923         | 57356         | 2.125723551        |
| 8            | 159431         | 108019         | 51412         | 2.101046448        |
| 9            | 139052         | 94840          | 44212         | 2.145118972        |
| 10           | 161205         | 111192         | 50013         | 2.223261952        |
| 11           | 145754         | 98502          | 47252         | 2.084610175        |
| 12           | 128856         | 87842          | 41014         | 2.141756473        |
| 13           | 111075         | 76125          | 34950         | 2.178111588        |
| 14           | 94184          | 64154          | 30030         | 2.136330336        |
| 15           | 95229          | 64728          | 30501         | 2.122159929        |
| 16           | 97558          | 65957          | 31601         | 2.087180785        |
| 17           | 107183         | 73572          | 33611         | 2.188926244        |
| 18           | 89645          | 61433          | 28212         | 2.177548561        |
| 19           | 54699          | 37230          | 17469         | 2.131203847        |
| 20           | 71004          | 48826          | 22178         | 2.201551087        |
| 21           | 46855          | 32690          | 14165         | 2.307800918        |
| 22           | 51765          | 36461          | 15304         | 2.382449033        |
| <b>TOTAL</b> | <b>3006670</b> | <b>2048337</b> | <b>958333</b> | <b>2.137395874</b> |
